# Supplementary material for: The Importance of Reading the Skin: Cutaneous Metastases of Pancreatic Cancer, a Systematic Review
Source: MDPI journal article supplement (doi:10.3390/jcm13010104), 2023-12-24
Supplement: s1 [file s1]

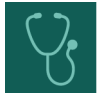

**Supplementary Table S1.** Cutaneous metastases presentation

| Authors                  | Year | Clinical presentation                                                                                                 | Authors                            | Year | Clinical presentation                                                                                                                      |
|--------------------------|------|-----------------------------------------------------------------------------------------------------------------------|------------------------------------|------|--------------------------------------------------------------------------------------------------------------------------------------------|
| Abdel Hafez              | 2008 | Violaceous nodules and indurated plaques                                                                              | Miyahara et al.                    | 1996 | Firm painless nodule                                                                                                                       |
| Abdelaziz et al.         | 2022 | Node with central erosive changes                                                                                     | Miyahara et al.                    | 1996 | Firm painless nodule                                                                                                                       |
| Aghighi                  | 2021 | Soft tissue prominence                                                                                                | Miyahara et al.                    | 1996 | Firm nodule with a purulent secretion                                                                                                      |
| Ambro et al.             | 2006 | Brown verrucous erythematous indurated plaque                                                                         | Miyahara et al.                    | 1996 | Three firm painful nodules                                                                                                                 |
| Arya                     | 2012 | Painful and itchy mass                                                                                                | Miyahara et al.                    | 1996 | Hard cutaneous induration                                                                                                                  |
| Atmatzidis et al.        | 2022 | Palpable hard and painful mass                                                                                        | Moon Ji et al.                     | 2016 | Firm, painful, and non-pruritic, with a central plug nodule                                                                                |
| Aydin et al.             | 2005 | Painless swelling                                                                                                     | Nasser                             | 2021 | T2 dermatomal rash with hyperpigmented indurated plaque with few satellite papules                                                         |
| Bai et al.               | 2012 | Swelling, redness and induration                                                                                      | Nawashiro                          | 2002 | Subcutaneous painless mass                                                                                                                 |
| Bdeiri K et al.          | 2013 | Painful lesion                                                                                                        | Pandey P et al.                    | 2016 | Slow growing lesion                                                                                                                        |
| Bhardwaj                 | 2017 | Redness and swelling with intermittent malodorous discharge                                                           | Pontinen                           | 2010 | Not clinically informative                                                                                                                 |
| Boysen                   | 2011 | Several erythematous elevated plaques                                                                                 | Prabhu                             | 2013 | Blackish nodule                                                                                                                            |
| Chakraborty              | 1977 | Nodular, tender, bluishpink mass and outline. Firm, irregular node                                                    | Ram                                | 2006 | Yellow nodule                                                                                                                              |
| Chapman                  | 1989 | Firm nodule                                                                                                           | Ramachandran P et al.              | 2020 | Asymptomatic lump                                                                                                                          |
| Fagan                    | 2018 | Painful cutaneous nodules                                                                                             | Rashleigh-Belcher HJ et al.        | 1986 | Cutaneous nodule                                                                                                                           |
| Flórez A et al.          | 2000 | Round, indurated mass, with an ulcerated centre                                                                       | Reyes García-De La Fuente M et al. | 2013 | Cutaneous nodules                                                                                                                          |
| Gawrieh et al.           | 2002 | painless non pruritic papule in right temporal region                                                                 | Saif MW et al.                     | 2011 | Discoloration and thickening of the skin                                                                                                   |
| Green et al.             | 1952 | Reddened plaque                                                                                                       | Salari                             | 2020 | Violaceous nodule                                                                                                                          |
| Hisham Zayan et al.      | 2008 | Violaceous nodules, indurated plaques                                                                                 | Shi                                | 2020 | Red swollen papules                                                                                                                        |
| Horino et al.            | 1999 | Firm, fixed, painless, noninflamed nodule                                                                             | Shin                               | 2015 | Mass                                                                                                                                       |
| Ito H et al.             | 2020 | Ulcer with exudate                                                                                                    | Siriwardena et al.                 | 1993 | Swelling                                                                                                                                   |
| Jun DW et al.            | 2005 | Multiple subcutaneous nodules                                                                                         | Sironi et al.                      | 1991 | Firm nodular mass                                                                                                                          |
| Kaoutzanis C et al.      | 2013 | Reddish, tender, firm nodule                                                                                          | Solin et al.                       | 1983 | Subcutaneous nodule                                                                                                                        |
| Kim et al.               | 2018 | Firm, erythematous, round, tender nodule                                                                              | St Peter et al.                    | 2003 | Subcutaneous nodule                                                                                                                        |
| Kotsantis I et al.       | 2016 | Bilateral oedema of the lower limbs                                                                                   | Takemura et al.                    | 2007 | Well-circumscribed, round, smoothsurfaced, erythematous, firm nodule                                                                       |
| Kuśnierz et al.          | 2021 | Rapidly enlarging tumour                                                                                              | Taniguchi                          | 1994 | Well-circumscribed, slightly indurated erythematous plaques with central ulceration and crusting. Several erythematous macules and nodules |
| Leyrat B et al.          | 2021 | Indurated nodules                                                                                                     | Tavío-Hernández                    | 2015 | Firm nodules, some with ulcerated surface covered with small clots                                                                         |
| March-Rodriguez A et al. | 2023 | Cutaneous ulceration with two smaller ulcers adjacent to the first ulcerated lesion and multiple subcutaneous nodules | Van Akkooi                         | 2010 | Two skin lesions supposed to be pyogenic granulomas                                                                                        |
| Masmoudi et al.          | 2008 | Infiltrative area with coalescing ulcerated papules at the umbilicus                                                  | Yanofsky V. R. et al.              | 2019 | Tender, erythematous to violaceous, deep-seated subcutaneous nodule                                                                        |
| Zhou H. et al.           | 2014 | Asymptomatic violaceous nodules                                                                                       | Yendluri V. et al.                 | 2007 | Indurated mass                                                                                                                             |
